# Supplementary material for: Improved Endurance Running Performance Following Haskap Berry (Lonicera caerulea L.) Ingestion
Source: MDPI journal article supplement (doi:10.3390/nu14040780), 2022-02-13
Supplement: s1 [file s1]

Supplementary Table S1. Dietary macro-nutrient content of the placebo and Haskap groups before test 1 and test 2. Dietary content was estimated from self-reported food diaries. Values are presented as means  $\pm$ SD. There were no difference between visits or between groups.

|                | <b>Carbohydrate<br/>(g)</b> | <b>Protein (g)</b> | <b>Fat (g)</b> | <b>Total Kcal</b> | <b>Fruit and<br/>vegetable<br/>portions</b> |
|----------------|-----------------------------|--------------------|----------------|-------------------|---------------------------------------------|
| <b>Control</b> |                             |                    |                |                   |                                             |
| Pre            | 254 $\pm$ 97                | 89 $\pm$ 23        | 79 $\pm$ 26    | 2047 $\pm$ 587    | 3 $\pm$ 2                                   |
| Post           | 235 $\pm$ 101               | 91 $\pm$ 49        | 71 $\pm$ 32    | 1819 $\pm$ 682    | 3 $\pm$ 2                                   |
| <b>Haskap</b>  |                             |                    |                |                   |                                             |
| Pre            | 213 $\pm$ 65                | 102 $\pm$ 54       | 70 $\pm$ 28    | 1873 $\pm$ 442    | 3 $\pm$ 1                                   |
| Post           | 226 $\pm$ 64                | 94 $\pm$ 59        | 71 $\pm$ 32    | 1876 $\pm$ 658    | 3 $\pm$ 2                                   |

Supplementary Table S2. Dietary micro-nutrient content of the placebo and Haskap groups before test 1 and test 2. Dietary content was estimated from self-reported food diaries. Values are presented as means  $\pm$ SD.

|                | K (mg)          | Ca (mg)       | Mg (g)        | Fe (mg)    | Zn (mg)    | Selenium<br>( $\mu$ g) | Thiamin –<br>B1 (mg) | Riboflavin<br>– B2 (mg) | Vit B6<br>(mg) | Vit B12<br>( $\mu$ g) | Vit C (mg)   | Vit D ( $\mu$ g) | Vit E (mg)    |
|----------------|-----------------|---------------|---------------|------------|------------|------------------------|----------------------|-------------------------|----------------|-----------------------|--------------|------------------|---------------|
| <b>Control</b> |                 |               |               |            |            |                        |                      |                         |                |                       |              |                  |               |
| Pre            | 2530 $\pm$ 759  | 904 $\pm$ 279 | 281 $\pm$ 83  | 11 $\pm$ 5 | 10 $\pm$ 5 | 71 $\pm$ 41            | 2.1 $\pm$ 1.7        | 1.7 $\pm$ 0.9           | 1.9 $\pm$ 1.0  | 4.9 $\pm$ 2.5         | 95 $\pm$ 86  | 8.8 $\pm$ 13.6   | 4.6 $\pm$ 4.7 |
| Post           | 2490 $\pm$ 673  | 859 $\pm$ 224 | 257 $\pm$ 74  | 12 $\pm$ 6 | 8 $\pm$ 3  | 58 $\pm$ 37            | 1.6 $\pm$ 1.1        | 1.5 $\pm$ 0.9           | 1.8 $\pm$ 0.9  | 4.2 $\pm$ 3.3         | 105 $\pm$ 88 | 8.1 $\pm$ 13.8   | 4.5 $\pm$ 5.3 |
| <b>Haskap</b>  |                 |               |               |            |            |                        |                      |                         |                |                       |              |                  |               |
| Pre            | 2504 $\pm$ 1114 | 864 $\pm$ 408 | 277 $\pm$ 144 | 9 $\pm$ 6  | 8 $\pm$ 5  | 86 $\pm$ 82            | 1.2 $\pm$ 0.5        | 1.6 $\pm$ 1.0           | 1.5 $\pm$ 1.1  | 6.1 $\pm$ 5.0         | 92 $\pm$ 86  | 4.7 $\pm$ 8.4    | 3.2 $\pm$ 3.5 |
| Post           | 2472 $\pm$ 563  | 745 $\pm$ 365 | 242 $\pm$ 90  | 8 $\pm$ 5  | 7 $\pm$ 4  | 67 $\pm$ 74            | 1.2 $\pm$ 0.4        | 1.4 $\pm$ 0.8           | 1.6 $\pm$ 0.7  | 5.0 $\pm$ 5.2         | 98 $\pm$ 105 | 4.1 $\pm$ 5.5    | 3.4 $\pm$ 5.1 |
